# Supplementary material for: Virtual tumor mapping and margin control with 3-D planning and navigation
Source: publisher site journal article supplement (doi:10.1515/iss-2021-0009), 2024-03-01
Supplement: Supplementary file [file j_iss-2021-0009_suppl_001.pdf]

## Reviewer Assessment

# P. Poxleitner et al.: Virtual tumor mapping and margin control with 3-D planning and navigation

## Reviewers' Comments to Original Submission

### Reviewer 1: Werner, Jens

Date received: 07-Dec-2021

Reviewer recommendation:

Reviewer overall scoring:

**Return to author for minor modifications**

**High**

#### Comments to author:

This is a nice review on computer technology based treatment approaches for head&neck Cancers. The subchapters are well chosen and written. Since the article is directed towards beginners in the field, some additional examples should be included in the article.

.

### Reviewer 2: Gellrich, Nils-Claudius

Date received: 28-Jul-2022

Reviewer recommendation:

Reviewer overall scoring:

**Return to author for minor modifications**

**Excellent**

#### Comments to author:

Minor corrections only. See my comments in the text

## Comments by the Editorial Office to the Editor-in-Chief Decision

All reviewer comments were addressed adequately and the manuscript should be published in its present stage.
